# Supplementary material for: Do clinical trials meet current care needs? Views of digestive oncology specialists in Galicia (Spain) using the Delphi method
Source: Research Square preprint supplement (doi:10.21203/rs.3.rs-228852/v1), 2021-03-12
Supplement: Supplementary file 1 [file 23fe2b3ff9d4d02fe9c74fd4.xlsx]

## Sheet: Table 4
		Table 4. Qualitative analysis of knowledge of clinical trials. Galicia, 2020.
		Questions	Qualitative textual quote
		27. Do you know how biological markers are used in clinical trials?	No complementary qualitative analyses have been performed.
		28. Do you know any kinds of biases that may affect a clinical trial?	No complementary qualitative analyses have been performed.
		29. Which part of the clinical trial do you analyse before deciding to take part in a study?	No complementary qualitative analyses have been performed.
		30. Do you consider yourself capable of analysing a clinical trial and deciding if it is well-produced or has biases?	No complementary qualitative analyses have been performed.
		31. Before you start prescribing new drugs, do you analyse the clinical protocols to find out whether the population is similar to the one being treated or if the study has been well-produced methodologically?	No complementary qualitative analyses have been performed.
		32. Have you identified any groups that have exerted pressure for the use of a particular treatment?	"I feel pressure from the industry and, on occasions, from prestigious oncologists." (T37). "The pharmaceutical industry always applies pressure, with greater or lesser subtlety, in order to increase the prescribing of new drugs. Our duty as oncologists is to be critical and maintain an appropriate distance." (T38).
		T: testimony.
