# Supplementary material for: Do clinical trials meet current care needs? Views of digestive oncology specialists in Galicia (Spain) using the Delphi method
Source: Research Square preprint supplement (doi:10.21203/rs.3.rs-228852/v1), 2021-03-12
Supplement: Supplementary file 3 [file a116127a933a7c0ad0769202.xlsx]

## Sheet: Table 2
	Table 2. Qualitative analysis of the assessment of usual practice in the case of there being no clinical trials in progress in your hospital. Galicia, 2020.
	Questions	Qualitative textual quote
	1. Did you find sufficient information on the results of existing clinical trials to take adequate decisions for the treatment of the majority of your patients? Explain your answer.	"The patients included in the trials match the clinical characteristics of a percentage (30-40%) of the patients I see day to day, so (although the decisions are based on the trials) the indications and recommendations are adapted and personalised to each patient for the other 70-60%." (T1). "The low evidence in many situations is a problem (for example, bile duct, second or third lines in multip…
	2. Do you consider the results of existing clinical trials to be suited to the needs of your patients? Explain your answer.	"The majority of the patients included in clinical trials are not comparable to those we see in our day-to-day practice." (T3).
	3. Do you consider the study populations in clinical trials that you have reviewed and used in the treatment of your patients to be similar to the population you treat? Explain your answer.	"I work in an area with an elderly population, which is not usually included in clinical trials." (T4). "The patients in clinical trials are selected for their general state of health and comorbidities and a large number of patients from the real population are left out." (T5).
	4. Do you consider that more real world data (RWD) studies are necessary in order to assess the efficacy of a treatment as a complement to the pivotal clinical trial? Explain your reasons.	"RWD studies allow the results to be verified in the real population and not in an ideal situation." (T6).
	T: testimony.
