# Supplementary material for: Do clinical trials meet current care needs? Views of digestive oncology specialists in Galicia (Spain) using the Delphi method
Source: Research Square preprint supplement (doi:10.21203/rs.3.rs-228852/v1), 2021-03-12
Supplement: Supplementary file 4 [file ec08e6b517fbe7019c867f90.xlsx]

## Sheet: Table 1
	Table 1. Quantitative analysis of the perception of the usefulness of clinical trials Galicia, 2020.
		Yes		No		Total
		n	%	n	%
	IN THE CASE OF THERE BEING NO CLINICAL TRIALS IN PROGRESS IN YOUR HOSPITAL
	Exploration of medical problems in the use of treatments after the results of the clinical trial have been obtained
	1. Did you find sufficient information on the results of existing clinical trials to take adequate decisions for the treatment of the majority of your patients? Explain your answer.	8	57.1429	6	42.8571	14
	2. Do you consider the results of existing clinical trials to be suited to the needs of your patients? Explain your answer.	5	35.7143	9	64.2857	14
	3. Do you consider the study populations in clinical trials that you have reviewed and used in the treatment of your patients to be similar to the population you treat? Explain your answer.	5	35.7143	9	64.2857	14
	4. Do you consider that more real world data (RWD) studies are necessary in order to assess the efficacy of a treatment as a complement to the pivotal clinical trial? Explain your reasons.	14	100	0	0	14
	IN THE CASE OF THERE BEING CLINICAL TRIALS IN PROGRESS IN YOUR HOSPITAL, HOW DO THEY AFFECT YOUR USUAL PRACTICE?
	General characteristics
	6. Do you receive financial or non-financial (academic or other) compensation for including patients in clinical trials? Specify the type of compensation.	5	35.7143	9	64.2857	14
	7. Have you found that often the risks of clinical trials in which you have taken part are greater than the benefits the patient may receive? Explain what you have observed.	1	7.14286	13	92.8571	14
	Logistics for handling clinical trials
	10. Do you consider that the monitors of clinical trials are sufficiently trained to control the characteristics of the clinical trials or have you observed that there was not adequate control? Explain your answer.	11	78.5714	3	21.4286	14
	11. Does your centre have a clinical trial management unit or a data manager?	10	71.4286	4	28.5714	14
	13. Have you observed that, when an important clinical trial is being performed in your hospital, there are improved logistics for monitoring equipment or treatment equipment that will be subsequently used for patients? What equipment?	3	21.4286	11	78.5714	14
	14. If there is, or already was, new equipment donated by pharmaceutical companies, new units implemented by pharmaceutical companies or any additional benefit for the hospital, do you consider that receiving these benefits conditions the recruitment or inclusion of patients in the study? Explain your answer.	5	35.7143	9	64.2857	14
	Participant selection
	17. Do you think that the financial or academic benefit received for patients included in the study affected any of your criteria for including a patient? You may give an example.	2	14.2857	12	85.7143	14
	18. Do you consider that sometimes you have been forced to include patients in a clinical trial because there are no other treatment alternatives in your hospital? You may give an example.	4	28.5714	10	71.4286	14
	19. When you recommend a patient to take part in a study, are you convinced that it is the most beneficial therapeutic option for the patient? Why?	12	85.7143	2	14.2857	14
	Doctors' motivation
	21. Do you think it is important to participate as an author of the clinical trials on which you have collaborated? Why?	14	100	0	0	14
	22. Is it a requirement for you to be allowed to be an author in order to participate in a clinical trial? Why?	2	14.2857	12	85.7143	14
	23. Before taking part in the first clinical trial, had you issued publications? Why?	9	64.2857	5	35.7143	14
	24. As a medical professional, do you think that the financial incentive influences the decision to take part in a clinical trial? Why?	6	42.8571	8	57.1429	14
	25. Do you consider the clinical trials in process will be useful for implementation in the future? Why?	13	92.8571	1	7.14286	14
	KNOWLEDGE OF CLINICAL TRIALS
	27. Do you know how biological markers are used in clinical trials? Mention a biological marker used in clinical research.	12	85.7143	2	14.2857	14
	28. Do you know any kinds of biases that may affect a clinical trial?	12	85.7143	2	14.2857	14
	30. Do you consider yourself capable of analysing a clinical trial and deciding if it is well-produced or has biases? Why?	8	57.1429	6	42.8571	14
	32. Have you identified any groups that have exerted pressure for the use of a particular treatment?	5	35.7143	9	64.2857	14
	The questions concerning only qualitative analysis are not included in this table.
