# Supplementary material for: Do clinical trials meet current care needs? Views of digestive oncology specialists in Galicia (Spain) using the Delphi method
Source: Research Square preprint supplement (doi:10.21203/rs.3.rs-228852/v1), 2021-03-12
Supplement: Supplementary file 5 [file 4cb645918b1228d705658cfe.xlsx]

## Sheet: Table 3
		Table 3. Qualitative analysis of the assessment of usual practice in the case of there being clinical trials in progress in your hospital. Galicia, 2020.
			Questions	Qualitative textual quote
		General characteristics	6. Do you receive financial or non-financial (academic or other) compensation for including patients in clinical trials? Specify the type of compensation.	"There is only really academic compensation if you are one of the coordinators or the main recruiters. As far as financial compensation is concerned, I do not receive it directly; part of it goes to the hospital foundation (I do not know how whether it really indirectly benefits me) and part of it goes to the Oncology Unit to feed back into the trials by paying the data managers, although there a…
			7. Have you identified whether the risks of clinical trials in which you have taken part are often greater than the benefits that the patient may receive? Explain what you have observed.	No complementary qualitative analyses have been performed.
		Logistics for handling clinical trials	8. Are some of the medications identified or used in clinical trials currently used in your clinical practice?	"I usually only take part in studies to which I have access and that provide a possible benefit over existing treatments or a new opportunity to compare with a placebo in advanced situations in patients that could potentially benefit from this. If I do not have a trial with these premises, I look for one outside. Being able to offer it in the patient environment and take part in it is an importan…
			9. What is the interest in or need for conducting a clinical trial in your hospital?	"[Clinical trials] have provided a healthcare paradigm shift with quicker access to drugs by the participants; they have also implemented knowledge in specific clinical situations (biomarkers, fragility, advanced age, etc.); so I think they are important for patients." (T10).
			10. Do you consider that the monitors of clinical trials are sufficiently trained to control the characteristics of the clinical trials or have you observed that there was not adequate control? Explain your answer.	"I am not sure, since the monitoring process is usually handled by the data manager team." (T11). "In some cases, but not all, I have noticed a lack of adequate control by the monitors." (T12). "Increasingly more monitors are poorly paid and have little training in clinical trials and the discipline concerned. They are normally university graduates who cannot find a job and decide to temporarily …
			11. Does your centre have a clinical trial management unit or a data manager?	"The oncology unit in my centre has a data manager and nursing [staff] paid for by the unit itself. The hospital does not provide us with any management unit resources ... basically we are charged for everything we request from the hospital with no kind of advantage for the oncology unit." (T15).
			12. Is there any kind of collaboration with external groups so that, once the clinical trial has been performed, the information can be analysed?	"We essentially work with cooperative research groups or with the industry, which handles data analysis" (T16). "Most the time it is external companies that perform the analysis and monitoring. Cooperative groups (I belong to several of them), hire the external CROs (contract research organisations), which handle data collection and analysis." (T17).
			13. Have you observed whether, when an important clinical trial is performed in your hospital, there are improved logistics for monitoring equipment or treatment equipment that will be subsequently used for patients? What equipment?	No complementary qualitative analyses have been performed.
			14. If there is, or already was, new equipment donated by pharmaceutical companies, new units implemented by pharmaceutical companies or any additional benefit for the hospital, do you consider that receiving these benefits conditions the recruitment or inclusion of patients in the study?	"We try to carry out active recruitment under any conditions, with or without an additional benefit for the hospital." (T18).
			15. Does the patient's socio-economic situation influence his/her participation in their study?	"It should not. The inclusion of the patient in a clinical trial must depend on whether they meet the inclusion criteria and no exclusion criteria, that they understand the objective of the trial and undertake to comply with the trial's demands. If the patient's socio-economic situation is negatively affected by inclusion in a clinical trial, he/she may not stick with it. And if this is repeated,…
			16. Do the number of tests that must be performed and patients' comorbidities influence recruitment for a clinical trial?	"Yes, this does have an influence due to the personal impact and the need to travel to the hospital." (T20). "Yes, it does influence patients who are potentially vulnerable, highly symptomatic, who have to wait, etc." (T21).
		Participants selection	17. Do you think that the financial or academic benefit received for patients included in the study affected any of your criteria for including a patient?	"I do not include more patients with financial/academic compensation in mind. If I think the study is of interest to clinical practice and I have committed myself to taking part, I try to include the patients I see that meet the criteria. I should point out that we even take part in some studies that do not cover the costs but are academically useful (we offset this with money left over from othe…
			18. Do you consider that sometimes you have been forced to include patients in a clinical trial because there are no other treatment alternatives in your hospital?	"There are treatments used in a clinical trial that are not available in my centre, so if there is no treatment alternative, they are referred to a centre where it is possible to take part in a clinical trial." (T23). "A clinical trial may be an alternative for a patient that can no longer receive healthcare medications, but they are not forced to do it, it is seen as a good option for that patie…
			19. When you recommend a patient to take part in a study, are you convinced that it is the most beneficial therapeutic option for the patient?	"I always look out for the patient's benefit." (T25). "Normally, yes, since if I think I have another valid and better option, I request it or use it as treatment. When there is a trial in progress we have to at least offer it to the patient as an option, but if they ask me for my opinion about other different options, I am frank about it." (T26).
			20. Regarding the criteria for including the patient in the study, select the correct option: a) It is difficult to find the ideal patient. b) You find it hard to recruit patients who meet all of the criteria; is not easy to get them to accept. c) Sometimes, this results in the same patient taking part in successive studies. d) They are all correct. (Multi-reponse question)	No complementary qualitative analyses have been performed.
		Doctors' motivation	21. Do you think it is important to participate as an author of the clinical trials on which you have collaborated?	"I think it is beneficial for researchers themselves in terms of their CVs although I do not think it is the main objective for taking part in research." (T27). "Due to recognition of the work performed." (T28). "The effort and the work must be seen to be rewarded." (T29).
			22. Is it a requirement for you to be allowed to be an author in order to participate in a clinical trial?	"It is not a priority objective for me. The main objective for taking part in trials should not be that it improves your CV. I consider that to be an indefensible perverse objective." (T30). "The important thing is to offer something more to our patients." (T31).
			23. Before taking part in the first clinical trial, had you issued publications?	No complementary qualitative analyses have been performed.
			24. As a medical professional, do you think that the financial incentive influences the decision to take part in a clinical trial?	"A clinical trial involves extra work and financial remuneration is a way of paying for that work." (T32). "At my centre, we have to pay lots of bills, including research personnel salaries; if the trial does not cover the expenses, it is very difficult to take part." (T33). "Not really, because I do not receive the benefit and because the clinical benefit of my patients always takes priority, al…
			25. Do you think the clinical trials in progress will be useful for implementation in the future?	"Obviously not all of them, but many of them, if they are positive, would offer new therapeutic options to patients and others clear up doubts about how to handle neoplasms without that meaning a new drug per se." (T35). "The treatments employed in clinical trials could be highly useful if they prove to have benefits or provide data about treatment sequences or subpopulations with a greater benef…
			T: testimony.
